# Supplementary material
Source: publisher site journal article supplement (https://www.spandidos-publications.com/4528/downloadSupplementary)
Supplement: Supplementary file 1 [file downloadSupplementary]

## Sheet: Supplementary Table S2
Table SII. Differentially expressed gene profiling for cholangiocarcinoma.
ID	Gene.Symbol	Gene.Title	log(fold change)
11720491_a_at	ITIH2	inter-alpha (globulin) inhibitor H2	-1.601
11735219_at	COL10A1	collagen, type X, alpha 1	-1.502
11717986_a_at	APOC1	apolipoprotein C-I	-1.487
11739534_a_at	FN1	fibronectin 1	-1.481
11718034_a_at	APOA2	apolipoprotein A-II	-1.457
11716366_s_at	CELA3A /// CELA3B	chymotrypsin-like elastase family, member 3A /// chymotrypsin-like elastase family, member 3B	-1.439
11757373_x_at	APOC1	apolipoprotein C-I	-1.421
11757349_a_at	FGA	fibrinogen alpha chain	-1.417
11716820_x_at	PRSS1	protease, serine, 1 (trypsin 1)	-1.36
11749460_x_at	FN1	fibronectin 1	-1.279
11747269_a_at	ALB	albumin	-1.273
11758268_s_at	MEST	mesoderm specific transcript homolog (mouse)	-1.236
11758071_s_at	SULF1	sulfatase 1	-1.225
11753839_x_at	APOA2	apolipoprotein A-II	-1.223
11715891_at	PNLIP	pancreatic lipase	-1.217
11756969_s_at	ALB	albumin	-1.215
11739536_x_at	FN1	fibronectin 1	-1.207
11736423_a_at	POSTN	periostin, osteoblast specific factor	-1.2
11760929_x_at	IGH@ /// IGHG1 /// IGHM /// IGHV4-31 /// LOC100290146	immunoglobulin heavy locus /// immunoglobulin heavy constant gamma 1 (G1m marker) /// immunoglobulin heavy constant mu /// immunoglobulin heavy variable 4-31 /// hypothetical protein LOC100290146	-1.196
11747927_a_at	POSTN	periostin, osteoblast specific factor	-1.188
11715444_at	CPB1	carboxypeptidase B1 (tissue)	-1.179
11759852_x_at	IGH@ /// IGHG1 /// IGHM /// IGHV4-31 /// LOC100290146	immunoglobulin heavy locus /// immunoglobulin heavy constant gamma 1 (G1m marker) /// immunoglobulin heavy constant mu /// immunoglobulin heavy variable 4-31 /// hypothetical protein LOC100290146	-1.179
11747923_s_at	LAMC2	laminin, gamma 2	-1.177
11747928_x_at	POSTN	periostin, osteoblast specific factor	-1.163
11732978_x_at	ALB	albumin	-1.157
11719446_a_at	CPA1	carboxypeptidase A1 (pancreatic)	-1.144
11720033_s_at	TRIM29	tripartite motif-containing 29	-1.124
11753762_x_at	KLK6	kallikrein-related peptidase 6	-1.079
11715280_s_at	KRT17	keratin 17	-1.046
11745837_x_at	FN1	fibronectin 1	-1.029
11735775_at	HIST1H4K	histone cluster 1, H4k	-1.015
11737325_a_at	LAMC2	laminin, gamma 2	-1.004
11746772_a_at	REG4	regenerating islet-derived family, member 4	-0.993
11744299_at	C4orf7	chromosome 4 open reading frame 7	-0.989
11757350_x_at	FGA	fibrinogen alpha chain	-0.985
11760819_x_at	IGHG1 /// IGHV4-31 /// LOC100290146	immunoglobulin heavy constant gamma 1 (G1m marker) /// immunoglobulin heavy variable 4-31 /// hypothetical protein LOC100290146	-0.98
11745244_x_at	IGH@ /// IGHG1 /// IGHG2 /// IGHG3 /// IGHM /// IGHV4-31 /// LOC100290146 /// LOC100294459	immunoglobulin heavy locus /// immunoglobulin heavy constant gamma 1 (G1m marker) /// immunoglobulin heavy constant gamma 2 (G2m marker) /// immunoglobulin heavy constant gamma 3 (G3m marker) /// immunoglobulin heavy constant mu /// immunoglobulin heavy variable 4-31 /// hypothetical protein LOC100290146 /// similar to immunoglobulin lambda-like polypeptide 1	-0.969
11754032_x_at	IGH@ /// IGHG1 /// IGHG2 /// IGHG3 /// IGHM /// IGHV4-31 /// LOC100290146 /// LOC100294459	immunoglobulin heavy locus /// immunoglobulin heavy constant gamma 1 (G1m marker) /// immunoglobulin heavy constant gamma 2 (G2m marker) /// immunoglobulin heavy constant gamma 3 (G3m marker) /// immunoglobulin heavy constant mu /// immunoglobulin heavy variable 4-31 /// hypothetical protein LOC100290146 /// similar to immunoglobulin lambda-like polypeptide 1	-0.959
11759110_a_at	HIST1H2BH	histone cluster 1, H2bh	-0.932
11748805_a_at	SLC13A5	solute carrier family 13 (sodium-dependent citrate transporter), member 5	-0.931
11751904_x_at	COL11A1	collagen, type XI, alpha 1	-0.93
11747002_a_at	CPA1	carboxypeptidase A1 (pancreatic)	-0.928
11727401_x_at	HOPX	HOP homeobox	-0.92
11741504_a_at	C5orf13	chromosome 5 open reading frame 13	-0.905
11749169_s_at	KRT6A /// KRT6B /// KRT6C	keratin 6A /// keratin 6B /// keratin 6C	-0.902
11728825_at	TRNP1	TMF1-regulated nuclear protein 1	-0.892
11746917_s_at	ANXA8 /// ANXA8L1 /// ANXA8L2	annexin A8 /// annexin A8-like 1 /// annexin A8-like 2	-0.89
11761467_x_at	IGHG3 /// IGHM	immunoglobulin heavy constant gamma 3 (G3m marker) /// immunoglobulin heavy constant mu	-0.887
11749409_a_at	DMKN	dermokine	-0.882
11724530_a_at	APOB	apolipoprotein B (including Ag(x) antigen)	-0.88
11736394_x_at	IL32	interleukin 32	-0.876
11743282_a_at	SULF1	sulfatase 1	-0.873
11755193_x_at	CP	ceruloplasmin (ferroxidase)	-0.87
11723791_s_at	APOC3	apolipoprotein C-III	-0.869
11750231_x_at	IGH@ /// IGHG1 /// IGHG2 /// IGHG3 /// IGHM /// IGHV4-31 /// LOC100290146	immunoglobulin heavy locus /// immunoglobulin heavy constant gamma 1 (G1m marker) /// immunoglobulin heavy constant gamma 2 (G2m marker) /// immunoglobulin heavy constant gamma 3 (G3m marker) /// immunoglobulin heavy constant mu /// immunoglobulin heavy variable 4-31 /// hypothetical protein LOC100290146	-0.868
11755915_a_at	HPS3	Hermansky-Pudlak syndrome 3	-0.867
11717912_s_at	CXCL14	chemokine (C-X-C motif) ligand 14	-0.864
11744905_x_at	ORM1	orosomucoid 1	-0.861
11755934_x_at	FGB	fibrinogen beta chain	-0.861
11748311_s_at	VCAN	versican	-0.847
11743231_at	TOR1AIP2	torsin A interacting protein 2	-0.844
11754065_x_at	ORM1	orosomucoid 1	-0.844
11755748_s_at	PLAC8	placenta-specific 8	-0.821
11755841_a_at	KIF26B	kinesin family member 26B	-0.818
11717301_at	TACSTD2	tumor-associated calcium signal transducer 2	-0.807
11723744_a_at	SLC13A5	solute carrier family 13 (sodium-dependent citrate transporter), member 5	-0.804
11726054_a_at	MUC4	mucin 4, cell surface associated	-0.798
11733058_a_at	ROD1	ROD1 regulator of differentiation 1 (S. pombe)	-0.798
11715351_at	COL1A1	collagen, type I, alpha 1	-0.782
11749980_x_at	HOPX	HOP homeobox	-0.78
11716715_a_at	CTSB	cathepsin B	-0.779
11728421_a_at	PLA2G7	phospholipase A2, group VII (platelet-activating factor acetylhydrolase, plasma)	-0.777
11757507_s_at	DSP	desmoplakin	-0.776
11747917_a_at	ITGA11	integrin, alpha 11	-0.772
11745004_x_at	HOPX	HOP homeobox	-0.765
11728640_s_at	EDARADD /// ENO1	EDAR-associated death domain /// enolase 1, (alpha)	-0.757
11716017_at	MAL2	mal, T-cell differentiation protein 2	-0.756
11715352_x_at	COL1A1	collagen, type I, alpha 1	-0.754
11755955_a_at	FAP	fibroblast activation protein, alpha	-0.754
11726333_s_at	LEF1	lymphoid enhancer-binding factor 1	-0.753
11743515_s_at	LAMC2	laminin, gamma 2	-0.745
11749912_x_at	IGFBP3	insulin-like growth factor binding protein 3	-0.745
11728152_a_at	HIST1H2BD	histone cluster 1, H2bd	-0.744
11756093_x_at	IGHG1 /// IGHM /// LOC100133862	immunoglobulin heavy constant gamma 1 (G1m marker) /// immunoglobulin heavy constant mu /// similar to hCG1773549	-0.743
11731096_at	WNT10A	wingless-type MMTV integration site family, member 10A	-0.742
11731496_at	INHBA	inhibin, beta A	-0.74
11744033_s_at	S100A11	S100 calcium binding protein A11	-0.731
11716480_a_at	SPINT1	serine peptidase inhibitor, Kunitz type 1	-0.725
11742184_a_at	LAMA3	laminin, alpha 3	-0.723
11757287_x_at	CSTB	cystatin B (stefin B)	-0.722
11728409_a_at	TRIM31	tripartite motif-containing 31	-0.719
11718722_at	PSCA	prostate stem cell antigen	-0.718
11744031_at	MMP7	matrix metallopeptidase 7 (matrilysin, uterine)	-0.718
11726982_a_at	CP	ceruloplasmin (ferroxidase)	-0.715
11719588_a_at	OAS1	2',5'-oligoadenylate synthetase 1, 40/46kDa	-0.714
11716909_a_at	NR2F6	nuclear receptor subfamily 2, group F, member 6	-0.712
11736567_a_at	LEF1	lymphoid enhancer-binding factor 1	-0.71
11722312_a_at	CLDN18	claudin 18	-0.706
11724481_a_at	C5orf13	chromosome 5 open reading frame 13	-0.706
11746730_a_at	TRIM29	tripartite motif-containing 29	-0.704
11723032_a_at	PLP2	proteolipid protein 2 (colonic epithelium-enriched)	-0.703
11743617_at	ITGA2	integrin, alpha 2 (CD49B, alpha 2 subunit of VLA-2 receptor)	-0.698
11719487_a_at	LAMB3	laminin, beta 3	-0.696
11735174_a_at	IL32 /// LOC100291980	interleukin 32 /// similar to Interleukin-32	-0.696
11724365_a_at	FOXP4	forkhead box P4	-0.693
11719561_s_at	SOX4	SRY (sex determining region Y)-box 4	-0.69
11733706_s_at	COL11A1	collagen, type XI, alpha 1	-0.689
11719815_at	BET1	blocked early in transport 1 homolog (S. cerevisiae)	-0.687
11722787_a_at	PKM2	pyruvate kinase, muscle	-0.687
11744268_a_at	GIPC1	GIPC PDZ domain containing family, member 1	-0.687
11736135_at	OAS2	2'-5'-oligoadenylate synthetase 2, 69/71kDa	-0.686
11727372_at	PAPSS1	3'-phosphoadenosine 5'-phosphosulfate synthase 1	-0.68
11737135_a_at	HOXC6	homeobox C6	-0.68
11754056_x_at	CSTB	cystatin B (stefin B)	-0.68
11719463_a_at	LSR	lipolysis stimulated lipoprotein receptor	-0.679
11723051_at	FGFBP1	fibroblast growth factor binding protein 1	-0.674
11733004_s_at	FCGR3A /// FCGR3B	Fc fragment of IgG, low affinity IIIa, receptor (CD16a) /// Fc fragment of IgG, low affinity IIIb, receptor (CD16b)	-0.674
11753289_s_at	RUNX1 /// SH3D19	runt-related transcription factor 1 /// SH3 domain containing 19	-0.671
11754471_a_at	HLA-DMB	major histocompatibility complex, class II, DM beta	-0.67
11754182_x_at	IL2RG	interleukin 2 receptor, gamma (severe combined immunodeficiency)	-0.667
11719792_at	GPRC5A	G protein-coupled receptor, family C, group 5, member A	-0.665
11729255_a_at	GIPC1	GIPC PDZ domain containing family, member 1	-0.665
11731693_at	HIST1H2AE	histone cluster 1, H2ae	-0.665
11749326_s_at	OLFML2B	olfactomedin-like 2B	-0.665
11749963_a_at	FGA	fibrinogen alpha chain	-0.661
11755606_x_at	IFI30	interferon, gamma-inducible protein 30	-0.66
11757141_s_at	SNORA25 /// TAF1D	small nucleolar RNA, H/ACA box 25 /// TATA box binding protein (TBP)-associated factor, RNA polymerase I, D, 41kDa	-0.659
11729661_a_at	GLB1	galactosidase, beta 1	-0.658
11739038_x_at	CEACAM5	carcinoembryonic antigen-related cell adhesion molecule 5	-0.658
11739066_s_at	MAZ	MYC-associated zinc finger protein (purine-binding transcription factor)	-0.658
11718293_a_at	CDKN2A	cyclin-dependent kinase inhibitor 2A (melanoma, p16, inhibits CDK4)	-0.654
11727553_a_at	PKIB	protein kinase (cAMP-dependent, catalytic) inhibitor beta	-0.653
11752641_a_at	PTK7	PTK7 protein tyrosine kinase 7	-0.652
11743585_a_at	DENR	density-regulated protein	-0.65
11728232_a_at	CLDN1	claudin 1	-0.646
11736568_x_at	LEF1	lymphoid enhancer-binding factor 1	-0.646
11727085_s_at	GJB2	gap junction protein, beta 2, 26kDa	-0.644
11729734_a_at	VIL1	villin 1	-0.643
11742712_a_at	THBS2	thrombospondin 2	-0.642
11723306_s_at	PYGO2	pygopus homolog 2 (Drosophila)	-0.639
11728233_a_at	CLDN1	claudin 1	-0.637
11755897_a_at	FN1	fibronectin 1	-0.635
11757941_s_at	THBS2	thrombospondin 2	-0.635
11746127_a_at	CLPTM1	cleft lip and palate associated transmembrane protein 1	-0.634
11751677_a_at	CLDN18	claudin 18	-0.634
11758168_s_at	MAGEF1	melanoma antigen family F, 1	-0.634
11740290_a_at	HOXC6	homeobox C6	-0.633
11722168_a_at	CSE1L	CSE1 chromosome segregation 1-like (yeast)	-0.631
11733254_a_at	FXYD3	FXYD domain containing ion transport regulator 3	-0.631
11728234_a_at	CLDN1	claudin 1	-0.629
11722181_a_at	ATP6V1C1	ATPase, H+ transporting, lysosomal 42kDa, V1 subunit C1	-0.627
11756058_a_at	CEACAM1	carcinoembryonic antigen-related cell adhesion molecule 1 (biliary glycoprotein)	-0.626
11751507_a_at	TNS3	tensin 3	-0.625
11715491_s_at	FSCN1	fascin homolog 1, actin-bundling protein (Strongylocentrotus purpuratus)	-0.623
11716343_a_at	JUP	junction plakoglobin	-0.623
11741719_a_at	ADAR	adenosine deaminase, RNA-specific	-0.621
11754181_a_at	IL2RG	interleukin 2 receptor, gamma (severe combined immunodeficiency)	-0.62
11737791_s_at	APOL1 /// APOL2	apolipoprotein L, 1 /// apolipoprotein L, 2	-0.619
11723103_x_at	GNB4	guanine nucleotide binding protein (G protein), beta polypeptide 4	-0.618
11718347_a_at	S100P	S100 calcium binding protein P	-0.616
11730974_x_at	CST2	cystatin SA	-0.616
11729379_s_at	CASK	calcium/calmodulin-dependent serine protein kinase (MAGUK family)	-0.613
11748219_a_at	UGT1A1 /// UGT1A10 /// UGT1A3 /// UGT1A4 /// UGT1A5 /// UGT1A6 /// UGT1A7 /// UGT1A8 /// UGT1A9	UDP glucuronosyltransferase 1 family, polypeptide A1 /// UDP glucuronosyltransferase 1 family, polypeptide A10 /// UDP glucuronosyltransferase 1 family, polypeptide A3 /// UDP glucuronosyltransferase 1 family, polypeptide A4 /// UDP glucuronosyltransferase 1 family, polypeptide A5 /// UDP glucuronosyltransferase 1 family, polypeptide A6 /// UDP glucuronosyltransferase 1 family, polypeptide A7 ///…	-0.613
11721705_at	COL7A1	collagen, type VII, alpha 1	-0.612
11757147_s_at	C7orf40 /// SNORA9	chromosome 7 open reading frame 40 /// small nucleolar RNA, H/ACA box 9	-0.612
11742923_a_at	LAPTM5	lysosomal protein transmembrane 5	-0.611
11746952_x_at	MDK	midkine (neurite growth-promoting factor 2)	-0.609
11728049_s_at	HIST1H4J /// HIST1H4K	histone cluster 1, H4j /// histone cluster 1, H4k	-0.608
11755918_a_at	PTK7	PTK7 protein tyrosine kinase 7	-0.608
11746313_a_at	TCF7L2	transcription factor 7-like 2 (T-cell specific, HMG-box)	-0.604
11724328_a_at	UBE2C	ubiquitin-conjugating enzyme E2C	-0.603
11742410_s_at	HIST2H3A /// HIST2H3C /// HIST2H3D	histone cluster 2, H3a /// histone cluster 2, H3c /// histone cluster 2, H3d	-0.602
11723597_at	MAP2K7	mitogen-activated protein kinase kinase 7	-0.601
11718037_x_at	MDK	midkine (neurite growth-promoting factor 2)	-0.6
11751956_a_at	MYH14	myosin, heavy chain 14, non-muscle	-0.6
11718498_s_at	F8A1 /// F8A2 /// F8A3	coagulation factor VIII-associated (intronic transcript) 1 /// coagulation factor VIII-associated (intronic transcript) 2 /// coagulation factor VIII-associated (intronic transcript) 3	-0.599
11718005_a_at	CDC25B	cell division cycle 25 homolog B (S. pombe)	-0.597
11742208_a_at	VCAN	versican	-0.597
11741704_x_at	HIST1H2BC	histone cluster 1, H2bc	-0.596
11754601_s_at	SPON2	spondin 2, extracellular matrix protein	-0.596
11763678_x_at	IGHM /// LOC100289944	immunoglobulin heavy constant mu /// similar to hCG2029977	-0.596
11755975_x_at	PKIB	protein kinase (cAMP-dependent, catalytic) inhibitor beta	-0.594
11726614_at	CDH2	cadherin 2, type 1, N-cadherin (neuronal)	-0.589
11757783_s_at	VCAN	versican	-0.588
11762115_a_at	DDI2	DNA-damage inducible 1 homolog 2 (S. cerevisiae)	-0.588
11739535_s_at	FN1	fibronectin 1	-0.587
11752342_x_at	PKM2	pyruvate kinase, muscle	-0.585
11721124_s_at	MMP11	matrix metallopeptidase 11 (stromelysin 3)	-0.584
11722818_a_at	GGH	gamma-glutamyl hydrolase (conjugase, folylpolygammaglutamyl hydrolase)	-0.584
11756947_a_at	CTSB	cathepsin B	-0.582
11751244_s_at	CNN2	calponin 2	-0.58
11741528_a_at	ACP1	acid phosphatase 1, soluble	-0.578
11748164_a_at	VCAN	versican	-0.576
11743191_a_at	NTM	neurotrimin	-0.575
11757171_x_at	SNORA71D	small nucleolar RNA, H/ACA box 71D	-0.575
11727069_at	UNC5B	unc-5 homolog B (C. elegans)	-0.573
11723069_at	GABBR1 /// UBD	gamma-aminobutyric acid (GABA) B receptor, 1 /// ubiquitin D	-0.571
11752779_x_at	BGN	biglycan	-0.571
11715657_a_at	GLB1	galactosidase, beta 1	-0.57
11747264_a_at	BCAS1	breast carcinoma amplified sequence 1	-0.57
11728655_at	IGFBP5	insulin-like growth factor binding protein 5	-0.568
11746128_x_at	CLPTM1	cleft lip and palate associated transmembrane protein 1	-0.568
11752402_x_at	CLDN18	claudin 18	-0.566
11717017_a_at	OCIAD2	OCIA domain containing 2	-0.565
11719840_at	PHLDA3	pleckstrin homology-like domain, family A, member 3	-0.564
11758263_s_at	CYBB	cytochrome b-245, beta polypeptide	-0.564
11719791_s_at	GPRC5A	G protein-coupled receptor, family C, group 5, member A	-0.562
11757551_a_at	MRPL3	mitochondrial ribosomal protein L3	-0.562
11718345_a_at	CNOT7	CCR4-NOT transcription complex, subunit 7	-0.561
11744326_s_at	RPL37 /// SNORD72	ribosomal protein L37 /// small nucleolar RNA, C/D box 72	-0.561
11721390_at	HTRA3	HtrA serine peptidase 3	-0.559
11723102_at	GNB4	guanine nucleotide binding protein (G protein), beta polypeptide 4	-0.559
11758097_x_at	MATN3	matrilin 3	-0.559
11719560_at	SOX4	SRY (sex determining region Y)-box 4	-0.558
11753109_a_at	CDH11	cadherin 11, type 2, OB-cadherin (osteoblast)	-0.558
11728656_at	IGFBP5	insulin-like growth factor binding protein 5	-0.556
11753883_x_at	IL2RG	interleukin 2 receptor, gamma (severe combined immunodeficiency)	-0.556
11750973_a_at	ALAS1	aminolevulinate, delta-, synthase 1	-0.555
11725515_a_at	ABCG1	ATP-binding cassette, sub-family G (WHITE), member 1	-0.554
11756983_a_at	F11R	F11 receptor	-0.554
11757170_at	SNORA71D	small nucleolar RNA, H/ACA box 71D	-0.553
11718290_a_at	FXYD5	FXYD domain containing ion transport regulator 5	-0.552
11736622_s_at	C1orf106	chromosome 1 open reading frame 106	-0.552
11751572_a_at	TAPBP	TAP binding protein (tapasin)	-0.551
11749548_a_at	KCTD1	potassium channel tetramerisation domain containing 1	-0.55
11751587_a_at	UCHL5	ubiquitin carboxyl-terminal hydrolase L5	-0.548
11739119_s_at	CNPY3	canopy 3 homolog (zebrafish)	-0.545
11756059_a_at	CXCL14	chemokine (C-X-C motif) ligand 14	-0.545
11718484_s_at	H1F0	H1 histone family, member 0	-0.544
11715683_a_at	KRT7	keratin 7	-0.54
11718772_at	SMARCE1	SWI/SNF related, matrix associated, actin dependent regulator of chromatin, subfamily e, member 1	-0.54
11733870_at	HLA-DOA	major histocompatibility complex, class II, DO alpha	-0.54
11752922_x_at	TUBB	tubulin, beta	-0.54
11721580_a_at	DIO2	deiodinase, iodothyronine, type II	-0.537
11721345_at	PLEK2	pleckstrin 2	-0.535
11728065_a_at	SALL4	sal-like 4 (Drosophila)	-0.535
11751141_a_at	ACTR3	ARP3 actin-related protein 3 homolog (yeast)	-0.534
11746872_a_at	COL1A1	collagen, type I, alpha 1	-0.532
11739976_a_at	ITGA11	integrin, alpha 11	-0.531
11742669_s_at	HIST2H4A /// HIST2H4B	histone cluster 2, H4a /// histone cluster 2, H4b	-0.529
11752877_x_at	TUBB	tubulin, beta	-0.529
11716633_a_at	TMEM50A	transmembrane protein 50A	-0.528
11725984_a_at	FBXO28	F-box protein 28	-0.528
11751483_s_at	BGN	biglycan	-0.528
11716716_x_at	CTSB	cathepsin B	-0.527
11720441_x_at	OLFML2B	olfactomedin-like 2B	-0.527
11745426_a_at	UHRF1BP1	UHRF1 binding protein 1	-0.527
11750250_a_at	PPP1R13L	protein phosphatase 1, regulatory (inhibitor) subunit 13 like	-0.525
11726050_a_at	FAM108C1	family with sequence similarity 108, member C1	-0.524
11753399_x_at	ANXA2	annexin A2	-0.524
11759549_a_at	MICAL2	microtubule associated monoxygenase, calponin and LIM domain containing 2	-0.524
11758519_s_at	PLOD3	procollagen-lysine, 2-oxoglutarate 5-dioxygenase 3	-0.523
11737878_a_at	GALNT2	UDP-N-acetyl-alpha-D-galactosamine:polypeptide N-acetylgalactosaminyltransferase 2 (GalNAc-T2)	-0.522
11741913_s_at	HSP90B1	heat shock protein 90kDa beta (Grp94), member 1	-0.522
11723028_a_at	MEST	mesoderm specific transcript homolog (mouse)	-0.521
11724256_s_at	OAS1	2',5'-oligoadenylate synthetase 1, 40/46kDa	-0.521
11753943_x_at	MICAL2	microtubule associated monoxygenase, calponin and LIM domain containing 2	-0.518
11747498_s_at	SORD	sorbitol dehydrogenase	-0.517
11721159_x_at	DRAM2	DNA-damage regulated autophagy modulator 2	-0.516
11723174_a_at	FNDC1	fibronectin type III domain containing 1	-0.515
11724034_at	CD2AP	CD2-associated protein	-0.515
11748678_a_at	F2R	coagulation factor II (thrombin) receptor	-0.515
11739128_a_at	CDH3	cadherin 3, type 1, P-cadherin (placental)	-0.513
11716751_a_at	GNS	glucosamine (N-acetyl)-6-sulfatase	-0.512
11763496_a_at	POLE3	polymerase (DNA directed), epsilon 3 (p17 subunit)	-0.512
11724151_a_at	TNS4	tensin 4	-0.508
11717013_a_at	SNRPF	small nuclear ribonucleoprotein polypeptide F	-0.507
11752885_x_at	TPP1	tripeptidyl peptidase I	-0.507
11753356_x_at	TUBB	tubulin, beta	-0.507
11757741_s_at	SOX4	SRY (sex determining region Y)-box 4	-0.506
11717103_s_at	SLC38A1	solute carrier family 38, member 1	-0.505
11737480_x_at	PON2	paraoxonase 2	-0.505
11749066_s_at	BGN	biglycan	-0.505
11719958_at	SGPL1	sphingosine-1-phosphate lyase 1	-0.504
11752611_s_at	SSR1	signal sequence receptor, alpha	-0.504
11757383_a_at	CTSH	cathepsin H	-0.503
11752354_a_at	KIAA1217	KIAA1217	-0.501
11716999_a_at	RASA1	RAS p21 protein activator (GTPase activating protein) 1	0.501
11727516_at	RAVER2	ribonucleoprotein, PTB-binding 2	0.501
11752361_s_at	NEXN	nexilin (F actin binding protein)	0.501
11754349_a_at	SFRS5	splicing factor, arginine/serine-rich 5	0.501
11763310_at	MIR21	microRNA 21	0.501
11729239_x_at	CSRP2	cysteine and glycine-rich protein 2	0.502
11753802_a_at	SFRS5	splicing factor, arginine/serine-rich 5	0.502
11747072_s_at	TUBB6	tubulin, beta 6	0.503
11740224_a_at	CHST4	carbohydrate (N-acetylglucosamine 6-O) sulfotransferase 4	0.504
11750085_a_at	TSC22D2	TSC22 domain family, member 2	0.504
11752506_s_at	LMNA	lamin A/C	0.504
11728922_at	ONECUT2	one cut homeobox 2	0.505
11750415_x_at	TUBB2C	tubulin, beta 2C	0.505
11753579_a_at	IL6ST	interleukin 6 signal transducer (gp130, oncostatin M receptor)	0.505
11718396_x_at	JUN	jun oncogene	0.506
11746898_x_at	ADH1B	alcohol dehydrogenase 1B (class I), beta polypeptide	0.507
11746970_at	NPY6R	neuropeptide Y receptor Y6 (pseudogene)	0.508
11730163_x_at	SLC6A8	solute carrier family 6 (neurotransmitter transporter, creatine), member 8	0.509
11741019_a_at	MAPK10	mitogen-activated protein kinase 10	0.509
11752869_s_at	CEBPD	CCAAT/enhancer binding protein (C/EBP), delta	0.509
11716920_at	PLVAP	plasmalemma vesicle associated protein	0.511
11744259_a_at	ATP1B3	ATPase, Na+/K+ transporting, beta 3 polypeptide	0.511
11748618_a_at	CCDC80	coiled-coil domain containing 80	0.511
11717514_a_at	ANXA1	annexin A1	0.512
11721032_s_at	FAM107A	family with sequence similarity 107, member A	0.513
11753257_a_at	CXCL12	chemokine (C-X-C motif) ligand 12	0.513
11757543_s_at	MYADM	myeloid-associated differentiation marker	0.513
11758208_s_at	KLF2	Kruppel-like factor 2 (lung)	0.515
11738001_a_at	C16orf89	chromosome 16 open reading frame 89	0.516
11751427_a_at	DNAJB1	DnaJ (Hsp40) homolog, subfamily B, member 1	0.516
11715918_s_at	CD24	CD24 molecule	0.517
11745596_a_at	IL1RL1	interleukin 1 receptor-like 1	0.517
11724037_at	PTGS2	prostaglandin-endoperoxide synthase 2 (prostaglandin G/H synthase and cyclooxygenase)	0.518
11721898_at	FAM3D	family with sequence similarity 3, member D	0.519
11743135_s_at	CEBPD	CCAAT/enhancer binding protein (C/EBP), delta	0.52
11731027_s_at	CREM	cAMP responsive element modulator	0.521
11734319_a_at	SLC17A4	solute carrier family 17 (sodium phosphate), member 4	0.521
11731026_a_at	CREM	cAMP responsive element modulator	0.522
11754575_s_at	AHNAK	AHNAK nucleoprotein	0.522
11718448_at	SH3BGRL2	SH3 domain binding glutamic acid-rich protein like 2	0.523
11729290_a_at	HAND2	heart and neural crest derivatives expressed 2	0.523
11734808_s_at	DTNA	dystrobrevin, alpha	0.525
11739617_x_at	CD44	CD44 molecule (Indian blood group)	0.525
11746402_x_at	ZFAND5	zinc finger, AN1-type domain 5	0.525
11741964_s_at	VEGFA	vascular endothelial growth factor A	0.526
11736120_s_at	ZFAND5	zinc finger, AN1-type domain 5	0.527
11746923_a_at	HSPB6	heat shock protein, alpha-crystallin-related, B6	0.527
11749319_a_at	PGAP1	post-GPI attachment to proteins 1	0.527
11758230_s_at	NFIA	nuclear factor I/A	0.527
11719789_x_at	TUBB2A	tubulin, beta 2A	0.529
11748650_a_at	ADAM33	ADAM metallopeptidase domain 33	0.529
11723709_a_at	CRY1	cryptochrome 1 (photolyase-like)	0.53
11730725_a_at	GABBR1	gamma-aminobutyric acid (GABA) B receptor, 1	0.53
11753292_x_at	CD44	CD44 molecule (Indian blood group)	0.53
11719047_s_at	WEE1	WEE1 homolog (S. pombe)	0.531
11747625_a_at	NRK	Nik related kinase	0.531
11718926_a_at	ARID5B	AT rich interactive domain 5B (MRF1-like)	0.533
11718394_at	JUN	jun oncogene	0.534
11720746_s_at	BCL6	B-cell CLL/lymphoma 6	0.534
11728453_a_at	DOCK9	dedicator of cytokinesis 9	0.535
11742821_s_at	OGN	osteoglycin	0.535
11726980_a_at	PAQR6	progestin and adipoQ receptor family member VI	0.536
11736119_a_at	ZFAND5	zinc finger, AN1-type domain 5	0.536
11763714_a_at	SSBP2	single-stranded DNA binding protein 2	0.536
11738262_a_at	AUTS2	autism susceptibility candidate 2	0.537
11718870_a_at	PALMD	palmdelphin	0.538
11739303_a_at	DLC1	deleted in liver cancer 1	0.538
11740182_a_at	RHOJ	ras homolog gene family, member J	0.538
11746264_a_at	PPAP2A	phosphatidic acid phosphatase type 2A	0.539
11723030_at	CRISPLD2	cysteine-rich secretory protein LCCL domain containing 2	0.54
11738396_a_at	COL28A1	collagen, type XXVIII, alpha 1	0.54
11756547_a_at	CLU	clusterin	0.54
11718320_at	CD93	CD93 molecule	0.541
11719898_s_at	HBEGF	heparin-binding EGF-like growth factor	0.542
11738073_s_at	SPRY1	sprouty homolog 1, antagonist of FGF signaling (Drosophila)	0.543
11716384_at	CCL2	chemokine (C-C motif) ligand 2	0.544
11736121_x_at	ZFAND5	zinc finger, AN1-type domain 5	0.545
11737482_x_at	CDR1	cerebellar degeneration-related protein 1, 34kDa	0.545
11717652_s_at	SPRY1	sprouty homolog 1, antagonist of FGF signaling (Drosophila)	0.546
11735703_at	MT1A	metallothionein 1A	0.546
11754792_a_at	RGMA	RGM domain family, member A	0.547
11757865_a_at	GADD45B	growth arrest and DNA-damage-inducible, beta	0.547
11721090_at	THBS1	thrombospondin 1	0.548
11715620_a_at	CRYAB	crystallin, alpha B	0.549
11715794_x_at	ACTG2	actin, gamma 2, smooth muscle, enteric	0.549
11716049_a_at	TRIB1	tribbles homolog 1 (Drosophila)	0.549
11719414_a_at	PBX1	pre-B-cell leukemia homeobox 1	0.549
11747154_a_at	FXYD6	FXYD domain containing ion transport regulator 6	0.549
11715766_a_at	DUSP1	dual specificity phosphatase 1	0.55
11758354_s_at	RNPC3	RNA-binding region (RNP1, RRM) containing 3	0.55
11719672_a_at	RCAN2	regulator of calcineurin 2	0.551
11717861_a_at	EGR1	early growth response 1	0.552
11726611_x_at	MAFF	v-maf musculoaponeurotic fibrosarcoma oncogene homolog F (avian)	0.552
11726801_at	EBF1	early B-cell factor 1	0.555
11729238_a_at	CSRP2	cysteine and glycine-rich protein 2	0.556
11720028_x_at	LDLR	low density lipoprotein receptor	0.557
11744047_a_at	MAP1B	microtubule-associated protein 1B	0.557
11748060_a_at	ADAMTSL4	ADAMTS-like 4	0.557
11743508_a_at	ARHGAP26	Rho GTPase activating protein 26	0.56
11715411_a_at	EPAS1	endothelial PAS domain protein 1	0.562
11744000_a_at	NFKBIA	nuclear factor of kappa light polypeptide gene enhancer in B-cells inhibitor, alpha	0.562
11754772_s_at	NR4A1	nuclear receptor subfamily 4, group A, member 1	0.562
11728923_at	ONECUT2	one cut homeobox 2	0.563
11744050_s_at	MAP1B	microtubule-associated protein 1B	0.564
11757721_s_at	CSRNP1	cysteine-serine-rich nuclear protein 1	0.564
11758530_s_at	KCNJ16	potassium inwardly-rectifying channel, subfamily J, member 16	0.564
11758952_at	AGR2	anterior gradient homolog 2 (Xenopus laevis)	0.564
11740038_s_at	ANKRD36 /// ANKRD36B /// LOC400986	ankyrin repeat domain 36 /// ankyrin repeat domain 36B /// protein immuno-reactive with anti-PTH polyclonal antibodies	0.566
11717326_at	KLF9	Kruppel-like factor 9	0.567
11721488_a_at	DLC1	deleted in liver cancer 1	0.568
11724971_a_at	FLT1	fms-related tyrosine kinase 1 (vascular endothelial growth factor/vascular permeability factor receptor)	0.568
11725110_a_at	NDE1	nudE nuclear distribution gene E homolog 1 (A. nidulans)	0.569
11753514_s_at	PNRC1	proline-rich nuclear receptor coactivator 1	0.57
11729157_a_at	MFAP4	microfibrillar-associated protein 4	0.571
11719788_s_at	TUBB2A	tubulin, beta 2A	0.572
11734311_s_at	CNN1	calponin 1, basic, smooth muscle	0.572
11741458_a_at	NR4A3	nuclear receptor subfamily 4, group A, member 3	0.573
11758526_s_at	RELN	reelin	0.573
11753024_a_at	NFIB	nuclear factor I/B	0.574
11721092_a_at	THBS1	thrombospondin 1	0.575
11734298_at	ETV3	ets variant 3	0.575
11744955_a_at	ANXA1	annexin A1	0.575
11717399_a_at	TIPARP	TCDD-inducible poly(ADP-ribose) polymerase	0.576
11718780_a_at	SSBP2	single-stranded DNA binding protein 2	0.579
11720558_a_at	GEM	GTP binding protein overexpressed in skeletal muscle	0.579
11726119_at	RPGR	retinitis pigmentosa GTPase regulator	0.579
11718335_a_at	LMOD1	leiomodin 1 (smooth muscle)	0.581
11736537_a_at	RHCE /// RHD	Rh blood group, CcEe antigens /// Rh blood group, D antigen	0.581
11725809_at	ARC	activity-regulated cytoskeleton-associated protein	0.583
11727601_a_at	WFDC1	WAP four-disulfide core domain 1	0.583
11729766_x_at	ZNF331	zinc finger protein 331	0.583
11748098_a_at	ZNF331	zinc finger protein 331	0.583
11720054_a_at	CCNH	cyclin H	0.584
11731599_a_at	FOSL2	FOS-like antigen 2	0.584
11721290_a_at	F3	coagulation factor III (thromboplastin, tissue factor)	0.585
11753338_x_at	FHL1	four and a half LIM domains 1	0.588
11757513_at	NFKBIZ	nuclear factor of kappa light polypeptide gene enhancer in B-cells inhibitor, zeta	0.588
11764031_at	GADD45B	Growth arrest and DNA-damage-inducible, beta	0.588
11725626_a_at	ACE2	angiotensin I converting enzyme (peptidyl-dipeptidase A) 2	0.589
11753878_s_at	IL6ST	interleukin 6 signal transducer (gp130, oncostatin M receptor)	0.591
11759135_x_at	NR4A1	nuclear receptor subfamily 4, group A, member 1	0.591
11762396_x_at	KIAA1324	KIAA1324	0.592
11744206_at	PAH	phenylalanine hydroxylase	0.593
11722323_a_at	NFASC	neurofascin homolog (chicken)	0.594
11718927_a_at	ARID5B	AT rich interactive domain 5B (MRF1-like)	0.596
11753632_x_at	ATF3	activating transcription factor 3	0.597
11723369_at	SHANK3	SH3 and multiple ankyrin repeat domains 3	0.598
11737234_s_at	LOC162632 /// LOC220594 /// USP6	TL132 pseudogene /// TL132 protein /// ubiquitin specific peptidase 6 (Tre-2 oncogene)	0.599
11744593_x_at	GRASP	GRP1 (general receptor for phosphoinositides 1)-associated scaffold protein	0.599
11763005_at	TRD@	T cell receptor delta locus	0.599
11717566_at	EMP1	epithelial membrane protein 1	0.601
11719412_at	PBX1	pre-B-cell leukemia homeobox 1	0.601
11730236_s_at	MYADM	myeloid-associated differentiation marker	0.603
11753900_x_at	MT2A	metallothionein 2A	0.603
11757266_s_at	GPX3	glutathione peroxidase 3 (plasma)	0.603
11757057_x_at	PLA2G2A	phospholipase A2, group IIA (platelets, synovial fluid)	0.604
11723686_s_at	FAM46A	family with sequence similarity 46, member A	0.605
11757545_x_at	PECAM1	platelet/endothelial cell adhesion molecule	0.605
11724619_at	RSPO3	R-spondin 3 homolog (Xenopus laevis)	0.606
11760312_at	NAMPT	nicotinamide phosphoribosyltransferase	0.606
11721638_s_at	CES1	carboxylesterase 1 (monocyte/macrophage serine esterase 1)	0.607
11724727_a_at	EIF5	eukaryotic translation initiation factor 5	0.607
11763717_a_at	CDKN1C	cyclin-dependent kinase inhibitor 1C (p57, Kip2)	0.607
11736342_at	EGR3	early growth response 3	0.61
11740030_s_at	CREM	cAMP responsive element modulator	0.61
11717565_s_at	EMP1	epithelial membrane protein 1	0.611
11739997_s_at	SMARCA2	SWI/SNF related, matrix associated, actin dependent regulator of chromatin, subfamily a, member 2	0.611
11747964_a_at	SLC4A7	solute carrier family 4, sodium bicarbonate cotransporter, member 7	0.611
11724795_at	ZG16B	zymogen granule protein 16 homolog B (rat)	0.613
11749118_a_at	SORBS1	sorbin and SH3 domain containing 1	0.613
11749905_a_at	CYR61	cysteine-rich, angiogenic inducer, 61	0.613
11760701_x_at	LSAMP	limbic system-associated membrane protein	0.615
11746849_a_at	C8orf34	chromosome 8 open reading frame 34	0.616
11735844_s_at	CCDC144A /// CCDC144B /// LOC220594	coiled-coil domain containing 144A /// coiled-coil domain containing 144B /// TL132 protein	0.617
11752535_a_at	CCNL1	cyclin L1	0.617
11718744_a_at	CXCL12	chemokine (C-X-C motif) ligand 12	0.619
11725625_s_at	ACE2	angiotensin I converting enzyme (peptidyl-dipeptidase A) 2	0.62
11757857_s_at	XIST	X (inactive)-specific transcript (non-protein coding)	0.62
11728727_at	CEACAM7	carcinoembryonic antigen-related cell adhesion molecule 7	0.621
11763761_a_at	TIMP1	TIMP metallopeptidase inhibitor 1	0.621
11720029_a_at	LDLR	low density lipoprotein receptor	0.622
11723371_x_at	SHANK3	SH3 and multiple ankyrin repeat domains 3	0.623
11723961_s_at	PTN	pleiotrophin	0.623
11754949_s_at	HSPB7	heat shock 27kDa protein family, member 7 (cardiovascular)	0.623
11745716_s_at	CAV1	caveolin 1, caveolae protein, 22kDa	0.625
11723805_a_at	AKAP12	A kinase (PRKA) anchor protein 12	0.627
11747726_s_at	STXBP6	syntaxin binding protein 6 (amisyn)	0.627
11720616_a_at	DNM1	dynamin 1	0.628
11718901_at	TGFBR3	transforming growth factor, beta receptor III	0.629
11742813_at	SEMA6A	sema domain, transmembrane domain (TM), and cytoplasmic domain, (semaphorin) 6A	0.631
11734884_a_at	IL1RL1	interleukin 1 receptor-like 1	0.634
11758842_at	THBS1	Thrombospondin 1	0.634
11736129_a_at	SFRS5	splicing factor, arginine/serine-rich 5	0.635
11745137_a_at	ZNF331	zinc finger protein 331	0.635
11717564_a_at	EMP1	epithelial membrane protein 1	0.636
11720488_a_at	HSPB6	heat shock protein, alpha-crystallin-related, B6	0.638
11736839_at	FAM198A	family with sequence similarity 198, member A	0.638
11737355_at	FXYD2	FXYD domain containing ion transport regulator 2	0.64
11736362_s_at	C13orf33	chromosome 13 open reading frame 33	0.643
11755611_a_at	PFKFB3	6-phosphofructo-2-kinase/fructose-2,6-biphosphatase 3	0.643
11747474_a_at	NR4A2	nuclear receptor subfamily 4, group A, member 2	0.644
11754442_x_at	ELN	elastin	0.649
11728504_a_at	BDKRB1	bradykinin receptor B1	0.65
11750736_a_at	STEAP4	STEAP family member 4	0.65
11743460_at	GPM6B	glycoprotein M6B	0.652
11744133_s_at	ZSWIM6	zinc finger, SWIM-type containing 6	0.653
11715949_s_at	KCTD12	potassium channel tetramerisation domain containing 12	0.655
11747329_x_at	FHL1	four and a half LIM domains 1	0.655
11735148_a_at	SOCS2	suppressor of cytokine signaling 2	0.656
11722995_at	ADH1B	alcohol dehydrogenase 1B (class I), beta polypeptide	0.659
11733148_a_at	ANXA4	annexin A4	0.659
11733155_a_at	COL9A1	collagen, type IX, alpha 1	0.659
11723370_s_at	SHANK3	SH3 and multiple ankyrin repeat domains 3	0.661
11731556_a_at	SYNPO2	synaptopodin 2	0.661
11743043_a_at	FBLN5	fibulin 5	0.662
11755688_a_at	ADAMTSL4	ADAMTS-like 4	0.665
11722664_a_at	GABRB3	gamma-aminobutyric acid (GABA) A receptor, beta 3	0.668
11715484_a_at	MCL1	myeloid cell leukemia sequence 1 (BCL2-related)	0.669
11725372_x_at	VEGFA	vascular endothelial growth factor A	0.67
11726628_a_at	SEMA4A	sema domain, immunoglobulin domain (Ig), transmembrane domain (TM) and short cytoplasmic domain, (semaphorin) 4A	0.672
11734659_a_at	FOS	FBJ murine osteosarcoma viral oncogene homolog	0.676
11719673_a_at	THBD	thrombomodulin	0.678
11758487_s_at	MPZ	myelin protein zero	0.679
11752940_a_at	EGR1	early growth response 1	0.68
11726124_at	TCN1	transcobalamin I (vitamin B12 binding protein, R binder family)	0.681
11717329_at	KLF9	Kruppel-like factor 9	0.683
11760700_at	LSAMP	limbic system-associated membrane protein	0.691
11736191_s_at	OGN	osteoglycin	0.693
11758070_s_at	PBX1	pre-B-cell leukemia homeobox 1	0.693
11746388_x_at	KIAA0146	KIAA0146	0.696
11734310_a_at	CNN1	calponin 1, basic, smooth muscle	0.699
11760979_at	NR4A1	nuclear receptor subfamily 4, group A, member 1	0.699
11731165_at	FGF19	fibroblast growth factor 19	0.704
11759525_at	GADD45B	growth arrest and DNA-damage-inducible, beta	0.706
11716974_a_at	PDK4	pyruvate dehydrogenase kinase, isozyme 4	0.707
11723754_a_at	TCF21	transcription factor 21	0.707
11717979_at	C7	complement component 7	0.708
11721091_a_at	THBS1	thrombospondin 1	0.709
11757368_x_at	ANXA4	annexin A4	0.71
11749793_a_at	ANXA4	annexin A4	0.715
11729765_a_at	ZNF331	zinc finger protein 331	0.716
11717980_x_at	C7	complement component 7	0.718
11754408_s_at	LDB2	LIM domain binding 2	0.718
11757621_a_at	MYLK	myosin light chain kinase	0.719
11748655_x_at	FHL1	four and a half LIM domains 1	0.721
11743444_s_at	RHOB	ras homolog gene family, member B	0.724
11749794_x_at	ANXA4	annexin A4	0.724
11715932_s_at	TUBB6	tubulin, beta 6	0.725
11757638_s_at	CD93	CD93 molecule	0.725
11729385_at	FOXF1	forkhead box F1	0.732
11736296_at	SLC5A1	solute carrier family 5 (sodium/glucose cotransporter), member 1	0.733
11758021_s_at	DDX3X	DEAD (Asp-Glu-Ala-Asp) box polypeptide 3, X-linked	0.735
11757376_s_at	MAT2A	methionine adenosyltransferase II, alpha	0.736
11715757_a_at	RGS2	regulator of G-protein signaling 2, 24kDa	0.739
11735704_x_at	MT1A	metallothionein 1A	0.743
11758730_x_at	DUSP1	dual specificity phosphatase 1	0.745
11717860_a_at	EGR1	early growth response 1	0.746
11745021_a_at	MYC	v-myc myelocytomatosis viral oncogene homolog (avian)	0.746
11715972_at	SMOC2	SPARC related modular calcium binding 2	0.749
11736851_a_at	TMEM107	transmembrane protein 107	0.749
11757894_x_at	NFKBIA	nuclear factor of kappa light polypeptide gene enhancer in B-cells inhibitor, alpha	0.749
11727345_s_at	FBLN1	fibulin 1	0.756
11729954_a_at	FHIT	fragile histidine triad gene	0.756
11731555_at	SYNPO2	synaptopodin 2	0.756
11747167_x_at	ADH1B	alcohol dehydrogenase 1B (class I), beta polypeptide	0.756
11727300_a_at	FGFR1	fibroblast growth factor receptor 1	0.76
11724706_at	ST8SIA3	ST8 alpha-N-acetyl-neuraminide alpha-2,8-sialyltransferase 3	0.763
11736704_a_at	C6	complement component 6	0.766
11729058_s_at	NR4A3	nuclear receptor subfamily 4, group A, member 3	0.767
11757612_a_at	ASRGL1	asparaginase like 1	0.767
11730072_at	CNTN3	contactin 3 (plasmacytoma associated)	0.769
11730162_s_at	LOC653562 /// SLC6A10P /// SLC6A8	similar to solute carrier family 6 member 8 /// solute carrier family 6 (neurotransmitter transporter, creatine), member 10 (pseudogene) /// solute carrier family 6 (neurotransmitter transporter, creatine), member 8	0.771
11718397_s_at	JUN	jun oncogene	0.772
11736190_a_at	OGN	osteoglycin	0.773
11717327_at	KLF9	Kruppel-like factor 9	0.776
11757871_s_at	PBX1	pre-B-cell leukemia homeobox 1	0.776
11717995_x_at	NR4A1	nuclear receptor subfamily 4, group A, member 1	0.779
11762280_a_at	EIF4A1	eukaryotic translation initiation factor 4A1	0.78
11762411_at	OK/SW-CL.36	OK/SW-CL.36	0.781
11750196_a_at	ANXA4	annexin A4	0.782
11719883_a_at	APOLD1	apolipoprotein L domain containing 1	0.783
11762326_at	CRISPLD2	cysteine-rich secretory protein LCCL domain containing 2	0.785
11715462_x_at	LYZ	lysozyme	0.786
11717587_a_at	GC	group-specific component (vitamin D binding protein)	0.786
11726800_at	EBF1	early B-cell factor 1	0.786
11724478_s_at	FOSL1	FOS-like antigen 1	0.787
11723545_a_at	PLD1	phospholipase D1, phosphatidylcholine-specific	0.79
11762151_a_at	NFATC2	nuclear factor of activated T-cells, cytoplasmic, calcineurin-dependent 2	0.791
11756162_s_at	PPAP2B	phosphatidic acid phosphatase type 2B	0.792
11715615_at	BTG2	BTG family, member 2	0.794
11719260_x_at	LMNA	lamin A/C	0.795
11740896_s_at	C17orf91	chromosome 17 open reading frame 91	0.796
11763307_s_at	NFATC2	Nuclear factor of activated T-cells, cytoplasmic, calcineurin-dependent 2	0.796
11751643_x_at	EGR1	early growth response 1	0.798
11748016_a_at	ACTG2	actin, gamma 2, smooth muscle, enteric	0.802
11718395_s_at	JUN	jun oncogene	0.805
11723031_a_at	CRISPLD2	cysteine-rich secretory protein LCCL domain containing 2	0.809
11757921_s_at	COL14A1	collagen, type XIV, alpha 1	0.812
11750502_a_at	NXF3	nuclear RNA export factor 3	0.814
11715691_s_at	ZFP36	zinc finger protein 36, C3H type, homolog (mouse)	0.818
11744128_x_at	CXCL2	chemokine (C-X-C motif) ligand 2	0.819
11730923_x_at	ADAMTS4	ADAM metallopeptidase with thrombospondin type 1 motif, 4	0.82
11743110_at	NAMPT	nicotinamide phosphoribosyltransferase	0.821
11715483_s_at	MCL1	myeloid cell leukemia sequence 1 (BCL2-related)	0.823
11733818_x_at	FHL1	four and a half LIM domains 1	0.824
11734962_x_at	ADAM33	ADAM metallopeptidase domain 33	0.826
11759999_at	CRISPLD2	Cysteine-rich secretory protein LCCL domain containing 2	0.827
11730214_at	DUOX2	dual oxidase 2	0.828
11717732_s_at	PFKFB3	6-phosphofructo-2-kinase/fructose-2,6-biphosphatase 3	0.829
11749537_a_at	C7	complement component 7	0.83
11749852_s_at	FOS	FBJ murine osteosarcoma viral oncogene homolog	0.832
11753010_x_at	FHL1	four and a half LIM domains 1	0.832
11754662_s_at	ADAMTS1	ADAM metallopeptidase with thrombospondin type 1 motif, 1	0.833
11757933_s_at	BTG2	BTG family, member 2	0.834
11758781_at	EMP1	epithelial membrane protein 1	0.834
11763718_x_at	CDKN1C	cyclin-dependent kinase inhibitor 1C (p57, Kip2)	0.835
11754317_a_at	ANXA4	annexin A4	0.843
11725371_s_at	VEGFA	vascular endothelial growth factor A	0.844
11760699_a_at	LSAMP	limbic system-associated membrane protein	0.845
11727638_a_at	AHI1	Abelson helper integration site 1	0.846
11756587_a_at	PTGDS	prostaglandin D2 synthase 21kDa (brain)	0.848
11755757_a_at	SYNM	synemin, intermediate filament protein	0.856
11719218_at	SOCS3	suppressor of cytokine signaling 3	0.857
11751986_at	MMP19	matrix metallopeptidase 19	0.861
11723751_at	TFF2	trefoil factor 2	0.865
11717862_x_at	EGR1	early growth response 1	0.869
11721543_a_at	CSRNP1	cysteine-serine-rich nuclear protein 1	0.871
11734658_s_at	FOS	FBJ murine osteosarcoma viral oncogene homolog	0.873
11725631_a_at	NR4A2	nuclear receptor subfamily 4, group A, member 2	0.875
11722994_s_at	ADH1A /// ADH1B /// ADH1C	alcohol dehydrogenase 1A (class I), alpha polypeptide /// alcohol dehydrogenase 1B (class I), beta polypeptide /// alcohol dehydrogenase 1C (class I), gamma polypeptide	0.879
11717978_at	C7	complement component 7	0.889
11754933_s_at	TSC22D2	TSC22 domain family, member 2	0.896
11739899_a_at	SLC19A3	solute carrier family 19, member 3	0.898
11752251_a_at	SPARCL1	SPARC-like 1 (hevin)	0.909
11718900_a_at	TGFBR3	transforming growth factor, beta receptor III	0.914
11724871_a_at	CLDN2	claudin 2	0.919
11719899_at	AG2	protein Ag2 homolog	0.926
11715482_a_at	MCL1	myeloid cell leukemia sequence 1 (BCL2-related)	0.931
11732178_a_at	MYH11	myosin, heavy chain 11, smooth muscle	0.942
11744127_at	CXCL2	chemokine (C-X-C motif) ligand 2	0.942
11744152_a_at	FBLN1	fibulin 1	0.942
11764032_at	CDKN1C	Cyclin-dependent kinase inhibitor 1C (p57, Kip2)	0.942
11716697_at	FABP4	fatty acid binding protein 4, adipocyte	0.943
11754738_a_at	PDE2A	phosphodiesterase 2A, cGMP-stimulated	0.948
11748945_a_at	ABI3BP	ABI family, member 3 (NESH) binding protein	0.957
11720007_a_at	STEAP4	STEAP family member 4	0.959
11749725_a_at	NR4A1	nuclear receptor subfamily 4, group A, member 1	0.961
11730721_a_at	NCAM1	neural cell adhesion molecule 1	0.964
11723193_s_at	LTF	lactotransferrin	0.968
11738611_s_at	CCL14 /// CCL14-CCL15 /// CCL15	chemokine (C-C motif) ligand 14 /// CCL14-CCL15 read-through transcript /// chemokine (C-C motif) ligand 15	0.972
11730298_a_at	SPARCL1	SPARC-like 1 (hevin)	0.978
11718506_at	TFF3	trefoil factor 3 (intestinal)	0.98
11733817_s_at	FHL1	four and a half LIM domains 1	0.982
11757628_s_at	TSPYL2	TSPY-like 2	0.986
11719633_a_at	KLF4	Kruppel-like factor 4 (gut)	0.987
11751355_a_at	CEACAM7	carcinoembryonic antigen-related cell adhesion molecule 7	0.991
11749726_x_at	NR4A1	nuclear receptor subfamily 4, group A, member 1	0.993
11725023_a_at	SPARCL1	SPARC-like 1 (hevin)	0.998
11739036_a_at	PLP1	proteolipid protein 1	1.002
11719531_a_at	MMP19	matrix metallopeptidase 19	1.009
11731557_at	SYNPO2	synaptopodin 2	1.01
11717994_a_at	NR4A1	nuclear receptor subfamily 4, group A, member 1	1.011
11738035_s_at	RTN4	reticulon 4	1.016
11717048_a_at	DES	desmin	1.017
11724866_a_at	SCGB3A1	secretoglobin, family 3A, member 1	1.017
11723411_s_at	PLP1	proteolipid protein 1	1.024
11716548_x_at	FGFR1	fibroblast growth factor receptor 1	1.026
11743673_at	KDM6B	lysine (K)-specific demethylase 6B	1.035
11732158_a_at	ADAMTS1	ADAM metallopeptidase with thrombospondin type 1 motif, 1	1.038
11732179_x_at	MYH11	myosin, heavy chain 11, smooth muscle	1.042
11717822_a_at	SLC4A4	solute carrier family 4, sodium bicarbonate cotransporter, member 4	1.063
11754267_x_at	HBA1 /// HBA2	hemoglobin, alpha 1 /// hemoglobin, alpha 2	1.07
11754334_s_at	EGR1	early growth response 1	1.09
11745722_x_at	FHL1	four and a half LIM domains 1	1.096
11744258_a_at	ATP1B3	ATPase, Na+/K+ transporting, beta 3 polypeptide	1.122
11752993_a_at	DUSP1	dual specificity phosphatase 1	1.123
11716110_s_at	PIGR	polymeric immunoglobulin receptor	1.128
11728398_x_at	MT1M	metallothionein 1M	1.138
11724872_a_at	CLDN2	claudin 2	1.147
11743674_x_at	KDM6B	lysine (K)-specific demethylase 6B	1.151
11757407_x_at	FBLN1	fibulin 1	1.16
11728397_at	MT1M	metallothionein 1M	1.162
11725310_at	CRISP3	cysteine-rich secretory protein 3	1.193
11762162_x_at	LMNA	lamin A/C	1.221
11763100_x_at	MT1JP	metallothionein 1J (pseudogene)	1.256
11717344_x_at	FOSB	FBJ murine osteosarcoma viral oncogene homolog B	1.274
11725309_at	CRISP3	cysteine-rich secretory protein 3	1.333
11747328_a_at	FHL1	four and a half LIM domains 1	1.37
11716111_x_at	PIGR	polymeric immunoglobulin receptor	1.433
11715348_x_at	HBB	hemoglobin, beta	1.47
11716112_at	PIGR	polymeric immunoglobulin receptor	1.484
11751287_a_at	MMP19	matrix metallopeptidase 19	1.495
11749542_a_at	SLC38A11	solute carrier family 38, member 11	1.502
11716109_a_at	PIGR	polymeric immunoglobulin receptor	1.51
11753736_s_at	MT1JP /// MT1M /// MT1P3	metallothionein 1J (pseudogene) /// metallothionein 1M /// metallothionein 1 pseudogene 3	1.551
11716486_at	FCGBP	Fc fragment of IgG binding protein	1.562
11753712_x_at	HBB	hemoglobin, beta	1.617
11717345_a_at	FOSB	FBJ murine osteosarcoma viral oncogene homolog B	1.784
11715347_s_at	HBD	hemoglobin, beta /// hemoglobin, delta	1.914
